# Supplementary material for: A Synthetic Biology Workflow Reveals Variation in Processing and Solubility of Nitrogenase Proteins Targeted to Plant Mitochondria, and Differing Tolerance of Targeting Sequences in a Bacterial Nitrogenase Assay
Source: PubMed Central journal article supplement (PMC7511584; doi:10.3389/fpls.2020.552160), 2020-09-10
Supplement: DataSheet_2.pdf [file DataSheet_2.pdf]

## Supplementary Material 2

**Supplementary Material 2:** Nucleotide sequences of *nif* genes used for *Nicotiana benthamiana* expression. SN designations are listed in Supplementary Material 1 Suppl. Table 1.

>nifB\_SN192\_SN201

```
ATGACATCATGCAGTTCTTTCTCAGGCCGAAAAGCATGTAGGCCCGCAGATGACTCAGC
ATTAACCTCTCTCGTAGCCGATAAAGCTGCCGCCATCCATGTTATAGTAGGCACGGCCA
CCACCGTTTCGCCAGAATGCACCTTCCAGTAGCTCCAGCATGTAATTTACAATGCAACTA
CTGCAACAGGAAATTCGACTGCAGCAACGAATCTAGGCCTGGCGTAAGCTCTACTTTAC
TGACTCCTGAGCAAGCAGTGGTAAAGGTTAGACAAGTAGCTCAGGCCATAACCACAATTG
AGTGTGTGTCGGTATAGCCGGGCCAGGGGATCCATTAGCTAATATTGCACGTACATTTAG
AACTCTCGAGCTGATAAGAGAACAATTGCCGGATTTAAACTGTGCCTCAGTACGAACG
GACTGATGCTGCCGGACGCAGTTGACAGATTGCTTGATGTTGGTGTGACCATGTCACA
GTAACAATCAATACGTTGGACGCAGAAATTGCTGCTCAGATATAACGCTTGGCTGTGGTT
GGATGGGGAGAGGTATTCCGGCAGGGAGGCCGGTCAAATATTAATCGCTAGGCAGCTG
GAGGGCGTTAGACGTCTGACTGCAAAGGGAGTCCTTGTTAAAATCAATAGCGTCCTTAT
TCCTGGCATCAACGATAGCGGTATGGCTGATGTAAGCAGAGCCTTGCGTGCTTCCGGGG
CATTCAATCATAACATTATGCCTTTAATCGCACGTCCAGAACACGGGACGGTTTTTTGGGC
TCAACGGGCAGCCTGAGCCGGACGCTGAAACGCTGGCTGCCACCAGAAGCAGGTGCGG
CGAAGTAATGCCGCAGATGACACATTGTCACCAATGCCGAGCCGATGCCATTGGCATGT
TGGGTGAGGACCGAAGTCAACAATTCACCCAGCTGCCAGCTCCCGAGAGCCTTCCGGCC
TGGCTTCCAATATTGCATCAAAGAGCACAACTGCATGCTTCAATCGCAACCCGAGGCGA
ATCTGAAGCCGACGACGCTTGCTTGGTTGCTGTGGCAAGTAGCAGGGGTGACGTTATAG
ACTGTCATTTTGGTCACGCAGACAGATTCTATATTTATAGTTTGTCCGCAGCTGGCATGG
TTTTGGTAAATGAAAGATTTACCCCAAAGTATTGCCAAGGTCGAGATGACTGTGAGCCT
CAGGATAACGCAGCCAGATTTGCTGCTATTCTCGAGTTGCTGGCAGATGTGAAGGCCGT
ATTTTGTGTGAGAATCGGCCACACGCCCTGGCAGCAGTTGGAGCAAGAGGGGCATCGAAC
CTTGTGTGGACGGAGCATGGAGGCCCGTCAGTGAGGTCTTGCCCTGCATGGTGGCAGCAA
AGACGTGGAAGTTGGCCTGCTGCACTCCCCACAAAGGGGTTGCT
```

>nifE\_SN38\_SN203

```
ATGAAGGGCAACGAGATTCTGGCTCTGCTTGATGAACCTGCTTGCGAGCATAACCACAA
GCAGAAGTCTGGTTGCTCTGCTCCTAAGCCTGGTGCTACTGCTGGTGGTTGTGCTTTTGA
TGGTGCTCAGATTACCCTGCTGCCTATCGCTGATGTTGCTCATCTTGTGCACGGTCCTATT
GGTTGCGCTGGTTCTTCTTGGGATAACAGGGGTTCTGCTAGCTCTGGTCCTACCTTGAAT
AGGCTTTTCCATGCTGTGAGGCATATCGTGACCAGGTATCATCCTGCTGCCGTGTTTCAT
CTACAATACCTGCGTTCCAGCTATGGAAGGCGACGATCTTGAAGCTGTTTGTGAGGCTGC
TCAGACTGCTACTGGTGTTCCTGTGATTGCTATCGATGCTGCTGGTTTCTACGGCAGCAA
GAACCTTGTAATAGGCTGGCTGGTGACGTGATGGTGAAGAGAGTTATTGGTCAGAGAG
AGCCTGCTCCTTGGCCTGAGTCTACTCTTTTTGCTCCTGAGCAGAGGCACGACATTGGTC
TTATTGGCGAGTTCAACATTGCCGGCGAGTTCTGGCATATTCAGCCTTTGTTGGATGAGC
```

TGGGCATCAGAGTGCTTGGATCTTTGTCTGGTGATGGCAGGTTTCGCTGAGATTCAGACA  
 ATGCATAGGGCCCAAGCTAACATGCTTGTGTGCTCTAGGGCTCTGATCAATGTGGCTAG  
 AGCTTTGGAACAGAGGTACGGAACCTTGGTTTGAGGGCTCTTTCTACGGTATCAGGG  
 CTACCTCTGATGCTCTTAGACAGCTTGCTGCTCTGCTGGGTGATGATGATCTTAGGCAGA  
 GAACCGAGGCTCTTATCGCTAGAGAAGAACAGGCTGCTGAGCTTGCACCTCAGCCTTGG  
 AGAGAACAGCTTAGAGGTAGGAAGGCTCTCCTTTACACTGGTGGTGTGAAGTCTTGGTC  
 TGTGGTTTCTGCTCTGCAGGATCTTGGTATGACTGTGGTGGCTACTGGCACTAGGAAGTC  
 TACCGAAGAGGATAAGCAGAGGATCCGTGAGCTTATGGGTGAAGAGGCTGTGATGCTTG  
 AAGAGGGTAATGCTAGGACCCTTCTGGATGTGGTGTACAGGTATCAGGCTGACCTTATG  
 ATCGCTGGCGGTAGGAATATGTACACCGCTTACAAGGCTAGGCTGCCGTTCTGGACAT  
 CAATCAAGAAAGAGAGCACGCTTTCGCTGGCTACCAGGGTATTGTGACTCTTGCTAGAC  
 AGCTGTGCCAGACCATCAACTCTCCAATTTGGCCTCAGACTCACTCTAGAGCACCTTGA  
 GA

>nifF\_SN138\_SN204

ATGGCTAACATCGGCATTTTCTTCGGCACCGATACCGGCAAGACCCGGAAGATTGCTAA  
 GATGATTCACAAGCAGCTGGGCGAGCTTGCTGATGCTCCTGTGAATATCAACAGGACCA  
 CCTTGGACGACTTTATGGCTTACCCTGTGCTTCTTCTTGGCACCCCTACTCTTGGTGATGG  
 TCAACTTCCTGGTCTTGAGGCTGGTTGTGAGTCTGAATCTTGGAGCGAGTTCATCAGCGG  
 TCTGGATGATGCTTCTCTGAAGGGTAAGACCGTGGCTCTTTTCGGTCTTGGAGATCAGAG  
 GGGTTACCCTGACAATTTTCGTGTCTGGTATGAGGCCTCTGTTTCGACGCTCTTTCTGCTAG  
 AGGTGCTCAGATGATTGGCTCTTGGCCTAATGAGGGCTACGAGTTCCTCTGCTTCTTCAGC  
 TCTTGAGGGCGATAGATTTCGTGGGTCTTGTGCTGGATCAGGACAACCAGTTTGATCAGA  
 CTGAGGCTAGGCTGGCTTCTTGGCTTGAAGAGATTAAGAGGACCGTGCTT

>nifH\_SN27\_SN205

ATGACCATGCGTCAGTGTGCCATTTACGGTAAGGGCGGTATTGGCAAATCAACTACTAC  
 CCAAACTTGGTAGCCGCTTTAGCTGAGATGGGCAAAAAGGTGATGATTGTGGGGTGCG  
 ATCCTAAAGCGGATTCAACTAGGCTTATTTTACATGCTAAGGCGCAAAATACAATTATG  
 GAGATGGCCGCGAGGTGGGTAGCGTTGAGGACTTAGAGCTCGAGGACGTTTTGCAGAT  
 CGGTTACGGGGACGTTAGGTGCGCCGAATCTGGAGGGCCTGAGCCCGGCGTCGTTGCG  
 CGGGCAGGGGTGTGATTACGGCGATCAACTTTCTTGAAGAAGAGGGGGGCATACGAGGA  
 TGACCTCGACTTCGTATTTTATGATGTATTAGGCGATGTCGTGTGCGGGGGATTTGCAAT  
 GCCTATCAGGGAAAACAAGGCTCAAGAGATTTACATTGTATGCTCTGGTGAAATGATGG  
 CGATGTACGCGGCGAACAATATCTCCAAGGGCATCGTTAAATATGCAAAGTCTGGGAAA  
 GTAAGGCTAGGGGGCCTTATATGTAACCAAGGCAGACAGAGGGAAGATGAGCTCA  
 TTATTGCCTTGGCGGAGAACTCGGTACGCAAATGATCCATTTTCGTACCGAGGGACAAT  
 ATAGTTCAACGTGCAGAGATTAGACGTATGACCGTAATCGAGTATGACCCTGCTTGCAA  
 ACAAGCCAATGAATATAGGACTCTTGCCCAGAAAATAGTCAACAATACTATGAAAGTAG  
 TACCAACCCCGTGTACTATGGATGAGCTTGAAAGTTTATTAATGGAGTTTGGGATTATGG  
 AAGAGGAAGATACGTCCATAATCGGCAAGACAGCGGCAGAAGAAAATGCCGCG

>nifJ\_SN139\_SN206

ATGAGCGGCAAGATGAAAACCATGGATGGTAACGCTGCTGCCGCCTGGATTTCTTACGC  
 TTTCACTGAAGTGGCTGCTATCTACCCGATCACTCCTTCTACTCCTATGGCTGAGAATGT

GGATGAATGGGCTGCTCAGGGTAAGAAGAACCTTTTCGGTCAGCCTGTGCGGCTGATGG  
AAATGCAATCTGAGGCTGGTGTCTGCTGGTGCAGTTCATGGTGCACCTTCAAGCTGGTGCTC  
TACTACTACCTATAACCGCTTCTCAGGGTCTGCTGCTGATGATCCCTAACATGTACAAGA  
TCGCTGGTGAGCTTCTGCCTGGTGTGTTCCATGTTTCTGCTAGGGCTCTTGCTACCAACA  
GCCTGAACATTTTCGGCGATCACCAGGATGTTATGGCTGTGAGACAAACCGGTTGCGCT  
ATGCTTGCTGAGAACAATGTGCAGCAGGTCATGGATCTTTCTGCTGTGGCTCACCTTGCT  
GCTATCAAGGGTAGAATCCCGTTCGTGAACTTCTTCGATGGCTTCAGGACCTCTCACGAG  
ATCCAGAAGATTGAGGTCTTGGAGTACGAGCAGCTTGCTACCCTTCTTGATAGGCCTGCT  
CTGGATTCTTTCAGGCGGAATGCACTTCATCCTGACCATCCTGTGATTAGGGGTACTGCT  
CAGAACCCGGACATCTACTTTCAAGAGAGAGAGGCTGGCAACAGGTTCTACCAAGCTCT  
GCCTGATATCGTCGAGAGCTACATGACCCAGATTTCTGCTCTTACCGGCAGAGAGTACC  
ACCTGTTCAATTACACTGGTGCCGCTGATGCTGAGCGGGTGATCATTGCTATGGGTTCTG  
TTTGCAGACACCGTGCAAGAGGTGGTGGATACTCTTAATGCTGCTGGCGAGAAGGTGGGC  
CTTCTTTCTGTTTCATCTTTTCCGGCCTTTCAGCCTGGCTCATTCTTTGCTCAGTTGCCTAA  
GACCGTGCAGAGGATTGCTGTGCTGGATAGGACAAAAGAACCTGGTGCTCAGGCTGAGC  
CTCTTTGCCTTGATGTGAAGAACGCTTTCTACCACCACGATGACGCTCCTCTTATCGTTG  
GTGGAAGGTATGCTCTTGGTGGCAAGGATGTGCTGCCTAACGATATTGCTGCTGTGTTTCG  
ACAACCTGAACAAGCCTCTTCCTATGGACGGTTTCACCCTGGGTATTGTGGATGACGTGA  
CCTTCACTTCTTTGCCTCCAAGGCAACAGACCCTTGCTGTGTCTCATGATGGTATCACCG  
CTTGCAAGTTCTGGGGTATGGGATCTGATGGTACTGTGGGCGCTAACAAAGAGCGCCATT  
AAGATCATCGGTGACAAGACCCCACTTACGCTCAGGCCTACTTCAGCTACGACTCTAA  
GAAGTCTGGCGGCATTACCGTGTCTCACCTTAGGTTTGGTGACCGGCCTATTAACAGCCC  
TTACCTTATTCACCGGGCCGACTTCATTTTCATGCAGCCAGCAGTCTTACGTCGAGAGGTA  
CGATCTTCTCGATGGTCTTAAGCCTGGTGGCACCTTCCCTTTTGAAGTCTCATGGTCAGA  
TGCCGAGCTTGAGCAGCATCTTCCTGTGGGATTCAAGAGATACCTGGCTCGTGAGAACA  
TCCACTTCTACACCTTAACGCTGTGGATATCGCACGTGAGCTTGGTCTTGGTGGTAGGT  
TCAACATGCTTATGCAGGCCGCTTCTTCAAGCTTGCTGCAATTATTGATCCTCAGACCG  
CTGCCGATTACCTGAAGCAAGCTGTTGAGAAGTCTACGGTTCTAAGGGCGCTGCTGTC  
ATTGAGATGAACCAGAGGGCTATTGAGCTTGGCATGGCTTCTCTGCATCAGGTGACAAT  
TCCAGCTCATTGGGCTACCTTGGATGAGCCTGCAGCTCAAGCTTCTGCTATGATGCCTGA  
TTTCATCCGGGATATCCTGCAGCCTATGAATAGGCAGTGTGGTGTGATCAGCTTCCCTGTGAG  
CGCTTTCGTCCGGTATGGAAGATGGTACTTTCCCTTCTGGTACTGCTGCTTGGGAGAAGAG  
GGGTATTGCTCTTGAAGTTCCTGTTTGGCAGCCTGAGGGTTGCACTCAATGTAATCAGTG  
CGCTTTCATCTGCCCTCACGCTGCTATTAGACCTGCTCTTTTGAACGGCGAGGAACATGA  
TGCAGCTCCAGTGGGTTTGTCTTCTAAGCCTGCTCAAGGCGCCAAAGAGTACCATTACCA  
CCTTGCTATTAGCCCCTGGATTGCTCTGGTTGCGGTAATTGTGTGGACATCTGTCCTGC  
TAGAGGCAAGGCTCTTAAGATGCAGAGCCTTGATTCTCAGAGGCAGATGGCTCCAGTTT  
GGGATTACGCTCTTGCTCTGACCCCTAAGAGCAACCCTTTCAGAAAGACTACCGTGAAG  
GGCAGCCAGTTCGAGACTCCTTTGCTTGAGTTTTCTGGTGTGCTTGCCTGGTTGTGGTGTGAG  
ACTCCATATGCTAGGCTTATCACCCAGCTGTTCCGGTGACAGGATGCTTATTGCTAACGCT  
ACCGGCTGCAGCTCTATTTGGGGTGTAGTGCTCCTTCTATCCCGTACACTACTAACCAC  
AGAGGTCATGGTCTGCTTGGGCTAACTCTCTGTTTCGAGGATAATGCTGAGTTCGGCCTG  
GGTATGATGCTTGGTGGACAGGCTGTTAGACAGCAGATCGCTGATGATATGACCGCTGC  
TCTTGCTTTGCCTGTGTCTGATGAGCTGTCTGATGCTATGAGACAGTGGCTGGCTAAGCA  
GGACGAAGGTGAAGGTAAGACTAGAGAAAGGGCTGATAGGCTTAGCGAGAGACTGGCTGCT  
GAGAAAGAGGGTGTCCACTTCTTGAACAGCTGTGGCAGAACAGGGACTACTTCGTTAG  
AAGGTCCAGTGGATCTTCGGTGGTGTGATGGTTGGGCTTACGATATCGGTTTCGGTGGTCT  
TGATCACGTGTTGGCTAGTGGTGTGAGGATGTGAACATTCTGGTGTTCGATACCGAGGTGT

ACAGCAACACTGGTGGCCAGTCTAGTAAGTCTACTCCAGTGGCTGCAATCGCTAAGTTT  
 GCTGCACAAGGTAAGCGGACCCGGAAGAAAGATCTTGGCATGATGGCTATGAGCTACG  
 GCAATGTGTATGTGGCTCAGGTTGCAATGGGCGCTGATAAGGATCAGACCCTTAGAGCT  
 ATTGCTGAGGCTGAAGCTTGGCCTGGTCCTTCTCTTGTGATTGCTTATGCTGCCTGCATC  
 AACCACGGTCTGAAGGCTGGTATGAGATGCTCTCAGAGAGAAGCTAAGAGGGCAGTTG  
 AGGCTGGATACTGGCATCTTTGGAGGTATCATCCACAGAGGGGAAGCTGAGGGTAAGACC  
 CCTTTCATGCTGGATTCTGAGGAACCGGAAGAGAGCTTCAGGGATTTCTTGCTTGGTGAG  
 GTGAGGTACGCTAGCCTTCATAAGACTACCCCTCACTTGGCTGACGCTTTGTTCTCTAGG  
 ACTGAAGAGGATGCTCGTGCTAGGTTGCTCAGTATAGAAGGCTTGCTGGTGAAGAG

>nifK\_SN140\_SN72

ATGAGCCAGACCATCGACAAGATCAACTCTTGCTACCCTCTGTTTCGAGCAGGACGAGTA  
 CCAAGAGCTGTTTAGGAACAAGAGGCAGCTGGAAGAGGCTCATGATGCTCAGAGGGTT  
 CAAGAGGTTTTTCGCTTGGACTACTACCGCTGAGTACGAGGCTCTTAACTTCCAGAGGGA  
 AGCTCTTACTGTGGACCCTGCTAAGGCTTGTC AACCTCTTGGTGCTGTGCTTTGCTCTCTG  
 GTTTTCGCTAACACCCTTTCCTTACGTTACGGTTCACGGTTCAGGGTTGTGTGGCTTACTTCAGG  
 ACCTACTTCAACCGGCACTTCAAAGAACCTATCGCCTGCGTGTGTCAGACAGCATGACTGA  
 AGATGCTGCTGTGTTTCGGTGGCAACAACAACATGAACCTTGGTCTGCAGAACGCTAGCG  
 CACTTTACAAGCCTGAGATTATCGCTGTGAGCACTACCTGCATGGCTGAGGTTATCGGTG  
 ATGATCTGCAGGCCTTCATTGCCAACGCTAAGAAGGATGGCTTCGTCGACTCTAGCATTG  
 CTGTGCCTCATGCTCATAACCCCAAGCTTCATTGGTTCTCATGTGACCGGCTGGGACAACA  
 TGTTTGAGGGATTTCGCTAAGACCTTACCCTGATTATCAAGGTCAGCCTGGTAAGCTGC  
 CTAAGCTTAATCTTGTGACCGGGTTCGAGACTTACCTGGGCAATTTTCAGGGTGCTGAAGC  
 GGATGATGGAACAGATGGCTGTTTCTTGCAGCCTCCTGTCTGATCCTTCTGAGGTTTTGG  
 ATACCCCTGCTGATGGTCACTACAGGATGTA CTCTGGTGGTACTACCCAGCAAGAGATG  
 AAGGAAGCTCCTGACGCTATTGATAACCCTTCTGCTTCAACCTTGGCAGCTGCTGAAGTCC  
 AAGAAAGTGGTGCAAGAAATGTGGAACCAGCCGGCTACTGAGGTGGCAATTCCTCTTGG  
 TCTTGTGCTACCGATGAGCTTCTTATGACCGTGTCTCAGCTGTCCGGTAAGCCTATTGC  
 TGATGCTCTTACTCTTGTGAGAGGGGCAGACTGGTGGATATGATGCTTGATTCTCACACCTG  
 GCTGCACGGCAAGAAATTCGGTCTTTACGGCGATCCTGATTTTCGTGATGGGTCTGACCA  
 GATTCCTGCTTGTGAGCTTGGTTGTGAGCCTACCGTGATTCTGTCTCACAACGCTAACAAGC  
 GGTGGCAAAAGGCCATGAACAAGATGCTGGATGCTAGCCCTTACGGCAGGGATAGTGA  
 GGTGTTCAATTAAGTGCATCTGTGGCACTTCCGGTCTTGTGATGTTTACTAGGCAGCCGGA  
 TTTCATGATCGGCAACAGCTACGGTAAGTTCATCCAGCGGGATACCCTGGCTAAGGGCA  
 AAGCTTTTGAGGTGCCACTTATCAGGCTTGGCTTCCCACCTTTTCGATAGGCATCATCTTC  
 ATCGGCAGACCACTTGGGGTTACGAGGGTGCTATGAACATTGTGACCACCTTGGTGAAC  
 GCCGTGCTTGAGAAGTTGGATAGCGATACTCTCAGCTGGGCAAGACCGATTACTCTTTC  
 GATCTTGTGCGGTAG

>nifM\_SN30\_SN207

ATGAATCCGTGGCAGAGATTTGCTAGGCAGAGGCTTGCTAGGTCTAGGTGGAATAGAGA  
 TCCTGCTGCTCTTGACCCTGCTGATACTCCTGCTTTTGAACAGGCTTGGCAGAGGCAGTG  
 TCATATGGAACAGACTATCGTTGCTAGGGTGCCAGAGGGTGATATTCAGCTGCTCTGCT  
 TGAGAACATTGCTGCTTCTCTTGTCTATCTGGCTGGATGAGGGCGATTTTGCTCCTCCTGA  
 AAGGGCTGCTATTGTGAGGCATCATGCTAGGCTTGTGAGCTGGCTTTTCGCTGATATTGCTAG  
 ACAAGCTCCTCAGCCTGATCTGTCTACTGTGCAGGCTTGGTATCTTAGGCATCAGACCCA

GTTTATGAGGCCTGAGCAGAGGTTGACTAGGCACCTTCTTTTGACCGTGGATAACGATA  
GGGAAGCTGTGCACCAGAGGATTCTTGGTCTTTACAGGCAGATCAACGCTAGCAGGGAT  
GCTTTTGCTCCACTTGCTCAGAGGCATTCTCATTGCCCTTCAGCTCTTGAGGAAGGTAGG  
CTTGGTTGGATTTCTAGGGGTCTGCTTTACCCGCAGCTTGAGACTGCTCTTTTCAGCCTTG  
CTGAGAACGCTCTGTCTCTGCCTATTGCTTCTGAGCTTGGCTGGCATCTTCTTTGGTGCGA  
GGCTATTAGACCTGCCGCTCCTATGGAACCTCAACAGGCTCTTGAAAGCGCTAGGGATT  
ATCTGTGGCAACAGTCTCAGCAGAGACACCAGAGACAATGGCTTGAGCAGATGATCTCT  
AGGCAGCCTGGTCTTTGTGGT

>nifN\_SN39\_SN208

ATGGCTGACATCTTCAGGACCGATAAGCCTCTTGCTGTGAGCCCTATTAAGACCGGTCA  
ACCTCTTGGTGCTATCCTGGCTTCTCTTGGTATCGAGCACTCTATTCCTCTTGTGCATGGT  
GCTCAGGGATGCAGCGCTTTTGCTAAGGTGTTCTTCATCCAGCACTTCCACGATCCTGTG  
CCTCTTCAGTCTACTGCTATGGATCCTACCAGCACCATCATGGGTGCTGATGGTAACATC  
TTTACCGCTCTGGATAACCCTGTGCCAGAGGAACAATCCTCAGGCTATTGTGCTTCTGAGC  
ACCGGTCTTTCTGAAGCTCAGGGCTCTGATATCTCTAGGGTTGTGAGGCAGTTCGGGAA  
GAGTATCCTAGGCATAAGGGTGTGCTATCCTTACCGTGAACACCCCTGATTTCTACGGC  
AGCATGGAAAACGGTTTCAGCGCTGTTCTTGAGAGCGTTATCGAACAGTGGGTTCACC  
AGCTCCTAGACCTGCTCAGAGAAATAGAAGGGTGAACCTGCTTGTGAGCCACCTTTGTT  
CTCCAGGTGATATCGAGTGGCTTAGGCGTTGCGTTGAGGCTTTTGGACTTCAGCCTATCA  
TCTGCCTGATCTGGCTCAGTCTATGGATGGTCATCTTGCTCAGGGCGATTCAGCCCTC  
TACTCAAGGTGGTACTCCTCTTAGGCAGATTGAGCAGATGGGACAGTCTCTGTGCTCTT  
TCGCTATTGGTGTGTCTCTGCACAGGGCTTCATCTTTGCTTGCTCCTAGATGCAGAGGTG  
AGGTGATCGCTTTGCCTCACCTTATGACTCTTGAGAGGTGCGACGCTTTCATTCACCAGC  
TGGCTAAGATTTCTGGTAGGGCTGTTCTGAGTGGCTTGAGAGACAAAGGGGTCAACTT  
CAGGACGCTATGATCGACTGCCATATGTGGCTTCAGGGTCAGAGAATGGCTATTGCTGC  
TGAGGGTGATCTTCTTGCTGCTTGGTGCGATTTGCTAACAGTCAAGGTATGCAGCCTGG  
TCTCTTGTTGCTCCTACTGGTCATCCTTCACTTAGGCAGTTGCCTGTTGAAAGGGTTGTG  
CCTGGTGATCTTGAGGATCTTCAGACCCTTCTTTGCGCTCACCTGCTGATCTTTTGGTGG  
CTAATTCTCACGCTAGGGACCTTGTGAGCAGTTTGTCTTTGCCCTTTGGTGAGAGCTGGAT  
TCCCCTTTTCGATAAGCTTGGCGAGTTCAGAAGAGTGAGGCAGGGATATTCTGGCATG  
AGGGATAACCTTTTCGAGCTGGCAAACCTGATTAGAGAGAGGCATCATCACCTGGCTCA  
CTACAGATCTCCATTGAGGCAGAACCCTGAGTCCTCTCTTTCTACTGGTGGTGCTTATGC  
TGCTGAT

>nifQ\_SN141\_SN209

ATGCCTCCTCTTGATTGGCTTCGTAGGCTTTGGCTTCTTTACCACGCTGGTAAGGGCTCAT  
TCCCTCTTAGGATGGGACTGTCTCCTAGAGATTGGCAGGCTCTTAGAAGAAGGCTTGGC  
GAAGTTGAGACTCCTCTGGATGGTGAGACTCTTACTAGGCGGAGACTTATGGCTGAGCT  
TAACGCTACTAGAGAGGAAGAAAGGCAGCAGCTTGGTGCTTGGCTTGCTGGTTGGATGC  
AACAAAGATGCTGGTCCATGGCTCAGATTATCGCTGAGGTGAGCCTTGCTTTCAACCACC  
TTTGGCAGGATCTTGGTCTTGCTTCTAGGGCTGAGCTGAGGCTTCTTATGTCTGATTGCTT  
CCCTCAGCTGGTGGTGATGAACGAGCATAACATGCGGTGGAAGAAGTTCTTCTACAGGC  
AGAGATGCCTTCTGCAGCAGGGTGAAGTTATTTGCCGGTCACCTTCTTGTGATGAGTGCT  
GGGAAAGAAGCGCTTGCTTCGAA

>nifS\_SN31\_SN210

ATGAAGCAGGTCTACCTGGACAACAATGCTACCACCAGGCTTGATCCTATGGTGCTCGA  
 AGCTATGATGCCTTTCCTGACCGATTTCTACGGCAACCCCTCTAGCATTACGATTTTCGG  
 TATTCAGCTCAGGCTGCTCTTGAAAGGGCTCATCAACAAGCTGCTGCTTTGCTTGGTGC  
 TGAGTACCCGCTCTGAGATCATCTTCACATCTTGCGCTACTGAGGCTACCGCTACTGCTAT  
 TGCTTCTGCTATCGCTCTGCTTCCTGAGCGGAGAGAGATTATCACCTCTGTTGTTGAGCA  
 CCCTGCTACCTTGGCTGCTTGTGAACATCTTGAGAGGCAGGGCTACAGAATCCACAGGA  
 TTGCTGTTGATTCTGAGGGCGCTCTTGACATGGCTCAGTTTAGGGCTGCTTTGTCTCCTA  
 GAGTGGCTCTGGTTTCTGTGATGTGGGCTAACAAATGAGACTGGCGTGCTGTTCCCTATTG  
 GTGAGATGGCTGAACTTGCACACGAACAGGGTGCACCTTTTCCACTGTGATGCTGTTTCA  
 GTGGTGGGCAAGATTCCCTATTGCAGTTGGTCAGACCAGGATCGACATGCTGTCTTGCTCT  
 GCTCATAAGTTCCACGGTCCAAAGGTGTGGGTTGCCTTTACCTTAGAAGGGGAAGTAG  
 ATTCAGGCCTCTGCTTAGAGGTGGTCACCAAGAGTATGGTAGACGTGCTGGAACCGAGA  
 ACATCTGCGGTATCGTTGGTATGGGTGCTGCTTGCAGCTTGCTAACATTCACCTGCTG  
 GTATGACCCACATTGGCCAGCTTAGGAATAGGCTTGAGCACAGGCTTTTGGCCTCTGTGC  
 CTTCTGTTATGGTTATGGGTGGTGGTCAGCCTAGAGTTCCTGGTACTGTGAATCTGGCCT  
 TCGAGTTCATTGAAGGCGAGGCTATTCTGCTGCTTCTGAACCAGGCTGGTATCGCTGCTT  
 CTTCTGGTTCTGCTTGCACCTCTGGTTCTTTGGAGCCTTCTCATGTGATGCGGGCAATGA  
 ACATTCCTTACACTGCTGCTCACGGGACCATCAGGTTTTCTTTGTCTAGGTACACCCGTG  
 AGAAAGAAATCGACTACGTGGTGGCTACCCTGCCTCCTATTATTGATAGGCTTAGGGCT  
 CTGTCCCGTACTGGCAAATGGTAAGCCTAGACCTGCAGACGCTGTGTTCACTCCTGTT  
 TATGGT

>nifU\_SN32\_SN211

ATGTGGAACACTACAGCGAGAAGGTGAAGGACCACTTCTTCAACCCTAGGAACGCTAGAGT  
 GGTGGACAATGCTAATGCTGTGGGTGATGTGGGTTCTCTGTCTTGCGGTGATGCTCTTAG  
 GCTTATGCTTAGGGTTGACCCGCAGTCTGAGATCATTGAAGAGGCTGGTTTCCAGACCTT  
 CGGTTGCGGTTCTGCTATCGCTTCTTCTAGCGCTTACCAGCTTATCATTGGTCACACT  
 CTTGCTGAGGCTGGCCAGATTAACCAAGCAGATTGCTGATTACCTGGACGGTTTGCCT  
 CCTGAGAAGATGCATTGCTCTGTGATGGGTCAAGAGGCTCTTAGGGCTGCAATTGCTAA  
 TTTACGGGGCGAGTCTCTGGAAGAGGAACACGATGAAGGTAAGCTGATCTGCAAGTGCT  
 TCGGTGTGGATGAGGGTCACATTAGAAGGGCTGTGCAGAACAACGGTCTTACCCTTTG  
 GCTGAGGTGATCAACTACACCAAGGCTGGTGGTGGTTGTACTTCTTGCCACGAGAAGAT  
 TGAGCTTGCTCTGGCTGAGATTCTTGCTCAGCAACCTCAAACACTCCTGCTGTGGCTTC  
 TGGTAAGGATCCTCATTGGCAGTCTGTCTGGACACCATTGCTGAACTTAGGCCTCACAT  
 TCAGGCTGATGGTGGCGATATGGCTCTTTTGTCTGTGACCAACCATCAGGTGACCGTGT  
 TTTGTCTGGTTCATGCTCTGGTTGCATGATGACCGATATGACCCTTGCTTGGCTGCAGCA  
 AAAGCTGATGGAAAGGACTGGCTGCTACATGGAAGTTGTGGCTGCT

>nifV\_SN142\_SN212

ATGGAACGGGTGCTGATCAACGATACCACCTTGAGAGATGGTGAGCAGTCTCCTGGTGT  
 TGCTTTCAGGACTTCTGAGAAGGTGGCAATTGCTGAGGCTCTTACGCTGCTGGTATCAC  
 CGCTATGGAAGTTGGTACTCCTGCTATGGGTGACGAAGAGATTGCTAGGATTCAGCTGG  
 TGAGAAGGCAGCTTCTGATGCTACTCTTATGACCTGGTGCAGGATGAACGCTCTTGAG  
 ATTAGGCAGTCTGCTGATCTGGGCATCGATTGGGTTGACATCTCTATCCCTGCTAGCGAT  
 AAGCTGAGGCAGTACAAGCTTAGAGAGCCTCTTGCTGTTCTGCTTGAAGGCTGGCTAT  
 GTTCATTCACCTTGCTCACACCCTGGGTCTGAAGGTGTGCATTGGTTGTGAGGATGCTAG

CAGAGCTTCTGGTCAGACCCTTAGGGCTATTGCTGAAGTGGCTCAAATGCTCCTGCTGC  
TAGGCTTAGGTACGCTGATACTGTGGGTCTGCTTGATCCTTTCACTACCGCTGCTCAGAT  
TAGCGCTCTTAGGGATGTTTGGTCTGGCGAGATTGAGATGCACGCTCACAACGATCTTG  
GTATGGCTACCGCTAATAACCCTGGCTGCTGTTTCTGCTGGTGCTACTTCTGTGAATACCA  
CCGTGCTTGGTCTTGGTGAGAGAGCTGGTAACGCTGCTGCTTGAAGCCTTCTGCTCTTG  
GTTTGGAGAGATGCCTGGGTGTTGAGACTGGTGTTCCTTCTGCTTTGCCTGCTCTTTG  
CCAGAGAGTTGCTGAAGCTGCACAGAGGGCAATTGATCCTCAACAGCCTCTTGTGGCG  
AGCTTGTGTTACACATGAGTCTGGTGTGCATGTGGCTGCTCTGCTTAGAGACTCTGAGA  
GCTACCAGTCTATCGCCCCATCTTATGGGCAGATCTTACAGGCTTGTGCTGGGTAAGC  
ACTCTGGTAGGCAAGCTGTAAACGGTGTGTTTCGATCAGATGGGCTACCACCTTAATGCC  
GCTCAGATCAACCAGCTTCTGCCTGCTATTAGACGGTTCGCTGAGAAGTGGAAAGAGGTC  
CCCTAAGGATTACGAGCTGGTGGCTATCTACGATGAGCTTTGTGGTGAGTCCGCTCTTAG  
AGCTAGAGGT

>nifW\_SN143\_SN213

ATGATGGAATGGTTCTACCAGATTCCCTGGTGTGGACGAGCTTAGGTCTGCTGAGTCATTC  
TTCCAGTTCTTCGCTGTGCCTTACCAGCCTGAGCTTCTTGGTAGATGCTCTCTTCTGTC  
TTGCCACCTCCATAGAAAGCTTAGGGCTGAAGTGCCTCTGCAGAACAGGCTTGAGGAT  
AATGATAGGGCTCCTTGGCTTCTGGCTAGAAGGCTTCTTGTGAGTCTTATCAGCAGCAG  
TTCCAAGAGTCTGGAAC

>nifX\_SN144\_SN214

ATGCCTCCTATCAACAGGCAGTTCGACATGGTGCATTCCGACGAGTGGTCTATGAAGGT  
GGCATTTCGCTAGCAGCGATTACAGGCATGTGGATCAGCATTTCGGTGCTACTCCTAGGCT  
TGTTGTGTACGGTGTGAAGGCTGATAGGGTGACCCTTATTAGAGTGGTGGACTTCAGCG  
TTGAGAACGGTCATCAGACCGAGAAGATCGCTAGAAGGATTCACGCTCTCGAGGATTGC  
GTGACCCTTTTCTGTGTGGCTATTGGGGATGCTGTGTTTCAGGCAGCTTCTTCAGGTTGGA  
GTTAGGGCTGAAAGAGTGCCTGCCGATAACAACATTGTGGGTCTGCTTCAAGAGATCCA  
GCTGTACTGGTACGATAAGGGCCAGAGAAAGAATCAGAGGCAGAGAGATCCTGAGAGG  
TTCACCAGATTGCTGCAAGAGCAAGAGTGGCACGGTGATCCTGATCCTAGAAGA

>nifY\_SN145\_SN215

ATGAGCGATAACGACACCCTGTTTTGGAGGATGCTTGCCCTTTTCCAGTCTCTGCCTGAT  
CTTCAACCTGCTCAGATTGTGGATTGGCTGGCTCAAGAATCTGGTGAGACTCTTACTCCT  
GAGAGGCTTGCTACTCTTACCCAACCTCAACTGGCTGCTTCTTTCCCTTCTGCTACTGCTG  
TTATGTCTCCTGCTAGGTGGTCTAGAGTGATGGCTTCTCTTCAGGGTGCCTTCCCTGCTC  
ACCTTAGAATTGTGAGGCCAGCTCAAAGGACCCCTCAACTTCTTGCTGCTTTCTGCTCTC  
AGGATGGCCTTGTGATTAACGGTCATTTTCGGTCAGGGCCGTCTGTTCTTCATCTACGCTT  
TTGATGAACAAGGCGGCTGGCTGTACGATCTTAGGGCGTTATCCTTCTGCTCCTCACCAGC  
AAGAGGCTAATGAAGTGAGAGCTAGGCTGATCGAGGATTGCCAGCTTTTGTCTGCCAA  
GAGATTGGTGGTCTGCTGCTGCTAGGCTTATTAGGCATAGGATTCACCCTATGAAGGCT  
CAGCCTGGAACCTACCATTACAGGCTCAGTGTGAGGCTATTAACACCCTTTTGGCTGGTAGG  
TTGCCCTCCATGGCTTGCTAAGAGGCTTAACAGGGATAACCCGCTGGAAGAGAGGGTTTT  
C

>nifZ\_SN146\_SN216

ATGAGGCCGAAGTTCACCTTCTCTGAAGAGGTTAGAGTGGTGC GGGCTATTAGGAACGA  
TGGTACTGTTGCTGGTTTTCGCTCCTGGTGCTCTTTTGGTTAGAAGGGGTTCTACCGGCTTC  
GTGAGAGATTGGGGAGTTTTCTTGCAGGACCAGATTATCTACCAGATTCACTTCCCCGAG  
ACTGACAGGATTATCGGCTGTAGAGAGCAAGAGCTGATCCCTATTACTCAGCCTTGGCT  
TGCTGGTAACCTGCAGTACAGGGATTCTGTGACTTGCCAGATGGCTCTTGCTGTGAATGG  
TGATGTTGTGGTGTCTGCTGGTCAGAGGGGTAGAGTTGAAGCTACTGATAGAGGTGAGC  
TGGGCGATTCTTACACCGTGGATTTAGCGGCAGATGGTTCAGGGTTCCAGTGCAGGCT  
ATTGCTCTTATCGAAGAGAGGGAAGAG
